# Supplementary material for: Modelling metastatic colonization of cholangiocarcinoma organoids in decellularized lung and lymph nodes
Source: Front Oncol. 2023 Jan 18;12:1101901. doi: 10.3389/fonc.2022.1101901 (PMC9890173; doi:10.3389/fonc.2022.1101901)
Supplement: Supplementary file 2 [file DataSheet_2.xlsx]

## Sheet: Sheet1
Gene Symbol	Division	Category	Log2 corrected Abundance: F31: Sample, dLu, 1	Log2 corrected Abundance: F32: Sample, dLu, 2	Log2 corrected Abundance: F33: Sample, dLu, 3	Log2 corrected Abundance: F28: Sample, dLN, 1	Log2 corrected Abundance: F29: Sample, dLN, 2	Log2 corrected Abundance: F30: Sample, dLN, 3
COL1A1	Core matrisome	Collagens	29.761	30.1277	30.0056	30.3835	29.9274	29.8638
COL1A2	Core matrisome	Collagens	29.576	29.7862	29.8905	30.0708	29.7301	29.4639
COL6A3	Core matrisome	Collagens	26.5472	27.68	27.7394	27.3552	28.1188	29.1137
COL6A1	Core matrisome	Collagens	27.939	28.4823	28.4748	28.2223	28.7879	29.7773
COL6A2	Core matrisome	Collagens	27.4529	28.0933	27.964	27.4456	28.255	29.0796
COL4A2	Core matrisome	Collagens	26.6783	25.4426	25.7008	24.1354	25.495	25.4343
COL2A1	Core matrisome	Collagens	25.7274	25.6538	25.7568	25.7047	25.3282	25.8437
COL4A1	Core matrisome	Collagens	26.4456	25.4182	25.4999	25.509	25.1863	25.9516
COL3A1	Core matrisome	Collagens	25.6738	25.627	25.6862	26.2279	25.519	26.0945
COL4A5	Core matrisome	Collagens	25.4369	23.8808	24.0905	21.8326	23.7833	23.8838
COL6A6	Core matrisome	Collagens	22.924	24.167	23.3949	16.7808	16.3063	17.9007
COL12A1	Core matrisome	Collagens	22.6586	22.1967	22.4804	19.2598	20.495	21.2829
COL8A1	Core matrisome	Collagens	24.6785	23.9067	24.6432	18.1297	20.7549	21.0312
COL5A2	Core matrisome	Collagens	23.0564	23.2482	23.3707	23.252	23.2383	23.3654
COL4A3	Core matrisome	Collagens	24.4602	22.6727	22.9251	20.4285	22.5209	22.5113
COL21A1	Core matrisome	Collagens	24.222	23.4982	23.1366	21.5968	25.0507	22.4202
COL14A1	Core matrisome	Collagens	20.3752	21.3324	21.5664	20.7356	21.6019	23.2362
COL4A4	Core matrisome	Collagens	21.8308	20.7835	19.961	#VALUE!	#VALUE!	15.8105
COL5A1	Core matrisome	Collagens	21.5571	20.0588	20.3489	20.4022	18.9452	21.1742
COL5A3	Core matrisome	Collagens	20.7421	20.0364	19.3883	18.802	20.1507	19.3439
COL18A1	Core matrisome	Collagens	19.5047	19.5228	19.8387	13.3624	17.6314	17.4827
COL6A5	Core matrisome	Collagens	18.1443	19.7693	18.0032	13.6164	15.8507	16.5429
COL16A1	Core matrisome	Collagens	19.7401	18.8554	18.123	16.9142	18.5394	18.5213
COL28A1	Core matrisome	Collagens	19.9982	19.1258	19.1567	14.1806	25.8315	16.9779
COL22A1	Core matrisome	Collagens	18.7259	18.1299	18.0831	19.7696	17.1391	20.5313
COL10A1	Core matrisome	Collagens	19.3976	17.6354	19.6122	17.1011	#VALUE!	20.3288
COL7A1	Core matrisome	Collagens	16.564	15.9262	18.7777	18.2179	16.4652	21.252
COL8A2	Core matrisome	Collagens	18.5481	17.8517	18.508	#VALUE!	16.4541	#VALUE!
COL4A6	Core matrisome	Collagens	16.1225	#VALUE!	17.6717	15.4665	#VALUE!	#VALUE!
COL15A1	Core matrisome	Collagens	16.6445	16.9419	17.8635	13.7364	18.4457	15.457
COL26A1	Core matrisome	Collagens	#VALUE!	15.8142	15.5412	#VALUE!	#VALUE!	18.3605
LAMA1	Core matrisome	ECM Glycoproteins	#VALUE!	#VALUE!	#VALUE!	#VALUE!	16.1524	#VALUE!
THBS1	Core matrisome	ECM Glycoproteins	#VALUE!	#VALUE!	#VALUE!	#VALUE!	15.2957	15.8212
ECM2	Core matrisome	ECM Glycoproteins	#VALUE!	#VALUE!	#VALUE!	#VALUE!	15.3023	#VALUE!
FBN1	Core matrisome	ECM Glycoproteins	25.6129	25.0934	26.024	25.5566	25.4135	25.8336
ELN	Core matrisome	ECM Glycoproteins	27.5764	27.3073	27.1425	22.751	22.7079	24.4102
LAMA5	Core matrisome	ECM Glycoproteins	25.4598	24.4446	24.5298	21.9925	22.5759	24.119
LAMB2	Core matrisome	ECM Glycoproteins	26.304	25.1448	25.3169	23.7695	25.0092	25.2926
POSTN	Core matrisome	ECM Glycoproteins	25.8407	27.1001	25.9975	25.1502	24.7319	25.7852
VTN	Core matrisome	ECM Glycoproteins	27.0885	26.7148	26.617	21.7856	23.6722	26.241
LAMC1	Core matrisome	ECM Glycoproteins	25.7894	24.7021	24.8135	22.9524	24.9025	24.8375
EMILIN1	Core matrisome	ECM Glycoproteins	24.9089	24.9975	25.1841	23.4102	21.7968	25.7528
LAMA3	Core matrisome	ECM Glycoproteins	23.9963	23.1337	23.097	18.7946	19.2756	22.4305
LAMB3	Core matrisome	ECM Glycoproteins	24.6604	23.7846	23.651	14.874	14.8813	18.293
NPNT	Core matrisome	ECM Glycoproteins	25.1699	24.849	24.368	17.2258	#VALUE!	20.498
FN1	Core matrisome	ECM Glycoproteins	21.6009	23.4828	22.6107	15.548	17.8601	22.2705
MFAP4	Core matrisome	ECM Glycoproteins	25.9535	25.6655	25.7698	24.6664	21.7629	24.8714
TGFBI	Core matrisome	ECM Glycoproteins	23.7525	24.3463	24.484	24.5653	25.2665	25.5689
LAMC2	Core matrisome	ECM Glycoproteins	24.3915	23.4183	23.3209	18.1636	#VALUE!	19.6251
SRPX	Core matrisome	ECM Glycoproteins	23.6486	24.6634	24.706	19.3787	20.5929	22.9993
FGG	Core matrisome	ECM Glycoproteins	24.4128	23.8493	24.1967	17.9221	15.4168	25.246
FGA	Core matrisome	ECM Glycoproteins	23.5729	23.3121	23.0716	18.5388	17.5992	24.2874
FBLN5	Core matrisome	ECM Glycoproteins	24.6048	23.8179	24.2089	24.3982	21.4002	23.2753
FBLN2	Core matrisome	ECM Glycoproteins	22.6842	22.803	23.9802	22.4	20.8742	20.7217
FGB	Core matrisome	ECM Glycoproteins	24.3379	23.8198	23.9721	17.5892	14.1605	24.6985
NID1	Core matrisome	ECM Glycoproteins	23.699	22.4149	22.6446	19.6658	22.1721	22.0554
EFEMP1	Core matrisome	ECM Glycoproteins	23.8634	23.4501	23.8831	22.7593	20.4218	22.7117
FBN2	Core matrisome	ECM Glycoproteins	21.2827	20.85	21.8906	21.5413	20.9895	21.9407
DPT	Core matrisome	ECM Glycoproteins	24.6768	24.7238	24.8651	24.7814	24.1322	25.5161
FBLN1	Core matrisome	ECM Glycoproteins	22.3601	22.8843	25.0792	21.2622	17.1393	19.7066
MFAP2	Core matrisome	ECM Glycoproteins	25.1438	23.8321	24.6258	22.5485	22.0234	23.5797
TINAGL1	Core matrisome	ECM Glycoproteins	22.1174	22.1926	22.7486	20.9869	21.6177	23.9454
FBN3	Core matrisome	ECM Glycoproteins	19.1469	18.3735	19.4228	19.0622	18.1858	19.5283
TNXB	Core matrisome	ECM Glycoproteins	17.3619	18.6558	18.4241	15.1608	16.7161	17.9942
LAMB1	Core matrisome	ECM Glycoproteins	19.3253	19.4034	19.7172	19.1027	23.0237	22.3068
NID2	Core matrisome	ECM Glycoproteins	19.9287	19.5223	19.7497	16.9445	21.6752	19.4162
LTBP1	Core matrisome	ECM Glycoproteins	19.3321	19.393	20.0728	17.951	16.2784	20.8505
RSPO4	Core matrisome	ECM Glycoproteins	21.7099	22.3095	22.1298	#VALUE!	#VALUE!	#VALUE!
LTBP2	Core matrisome	ECM Glycoproteins	17.681	18.9987	18.8865	#VALUE!	#VALUE!	#VALUE!
VWA1	Core matrisome	ECM Glycoproteins	20.303	20.8682	21.3458	19.0907	24.0021	22.5345
LAMA4	Core matrisome	ECM Glycoproteins	18.8642	18.4902	18.3087	17.1306	21.1288	19.2934
TNC	Core matrisome	ECM Glycoproteins	18.1151	19.6095	15.8537	17.2341	13.0478	21.3463
CILP2	Core matrisome	ECM Glycoproteins	19.0442	#VALUE!	#VALUE!	21.2248	#VALUE!	23.171
LTBP4	Core matrisome	ECM Glycoproteins	18.6071	18.0904	18.1309	17.7004	14.9384	15.6581
LGI4	Core matrisome	ECM Glycoproteins	18.6432	19.4234	19.8571	13.8683	19.1769	16.1099
LAMA2	Core matrisome	ECM Glycoproteins	16.0154	16.9916	16.6056	17.3561	23.2142	19.5555
MATN2	Core matrisome	ECM Glycoproteins	17.0425	18.2629	18.3722	16.6389	17.776	18.2744
MFAP5	Core matrisome	ECM Glycoproteins	20.6679	20.2963	21.3758	21.2461	22.7524	22.0251
EMILIN2	Core matrisome	ECM Glycoproteins	17.8629	18.2717	18.087	17.1364	#VALUE!	19.8846
MFGE8	Core matrisome	ECM Glycoproteins	19.1052	17.5287	20.4518	18.072	15.3108	18.311
CILP	Core matrisome	ECM Glycoproteins	13.1621	17.1009	18.5112	#VALUE!	15.678	15.7332
EMID1	Core matrisome	ECM Glycoproteins	18.5928	#VALUE!	#VALUE!	#VALUE!	#VALUE!	20.0145
THSD4	Core matrisome	ECM Glycoproteins	16.5834	17.155	17.7525	16.182	#VALUE!	17.5935
SRPX2	Core matrisome	ECM Glycoproteins	18.1961	19.4187	17.6011	#VALUE!	21.7833	16.4157
AGRN	Core matrisome	ECM Glycoproteins	17.6046	15.769	16.0796	12.275	15.6478	14.5695
BMPER	Core matrisome	ECM Glycoproteins	17.4548	17.7892	16.4813	#VALUE!	#VALUE!	16.6919
IGSF10	Core matrisome	ECM Glycoproteins	15.4404	15.3454	15.9138	#VALUE!	#VALUE!	#VALUE!
MMRN1	Core matrisome	ECM Glycoproteins	17.0873	16.0027	16.4582	16.572	12.4569	19.9632
ABI3BP	Core matrisome	ECM Glycoproteins	14.6328	16.7965	16.5891	#VALUE!	#VALUE!	#VALUE!
IGFALS	Core matrisome	ECM Glycoproteins	16.1365	20.6633	17.3285	13.1499	14.962	17.2378
AEBP1	Core matrisome	ECM Glycoproteins	15.9537	16.2815	16.2162	#VALUE!	15.9245	#VALUE!
ECM1	Core matrisome	ECM Glycoproteins	16.0622	17.5479	17.0499	#VALUE!	#VALUE!	15.3074
NTNG1	Core matrisome	ECM Glycoproteins	17.8846	16.8302	16.3245	#VALUE!	#VALUE!	#VALUE!
HMCN2	Core matrisome	ECM Glycoproteins	13.3298	16.0531	13.0878	13.1729	#VALUE!	18.2448
EFEMP2	Core matrisome	ECM Glycoproteins	16.517	15.0944	16.7693	#VALUE!	#VALUE!	#VALUE!
HMCN1	Core matrisome	ECM Glycoproteins	12.2902	12.3574	15.4859	#VALUE!	#VALUE!	#VALUE!
VWF	Core matrisome	ECM Glycoproteins	13.1633	14.8632	12.8334	#VALUE!	#VALUE!	#VALUE!
MMRN2	Core matrisome	ECM Glycoproteins	15.4998	14.5855	14.692	#VALUE!	#VALUE!	#VALUE!
RSPO2	Core matrisome	ECM Glycoproteins	16.2276	17.1338	15.8658	#VALUE!	#VALUE!	#VALUE!
VWA2	Core matrisome	ECM Glycoproteins	14.6343	15.2651	14.5248	#VALUE!	#VALUE!	#VALUE!
PCOLCE	Core matrisome	ECM Glycoproteins	14.3724	15.2722	15.7109	#VALUE!	#VALUE!	#VALUE!
MXRA5	Core matrisome	ECM Glycoproteins	12.0431	12.3347	12.1865	#VALUE!	#VALUE!	#VALUE!
SVEP1	Core matrisome	ECM Glycoproteins	13.7074	11.4035	11.5548	#VALUE!	#VALUE!	#VALUE!
EMILIN3	Core matrisome	ECM Glycoproteins	12.2234	#VALUE!	#VALUE!	13.3187	20.5195	16.2949
CTSB	Matrisome-associated	ECM Regulators	#VALUE!	#VALUE!	#VALUE!	#VALUE!	#VALUE!	21.6701
CTSC	Matrisome-associated	ECM Regulators	#VALUE!	#VALUE!	#VALUE!	#VALUE!	#VALUE!	19.5045
SERPINB9	Matrisome-associated	ECM Regulators	#VALUE!	#VALUE!	#VALUE!	19.3596	16.0221	23.45
PLOD1	Matrisome-associated	ECM Regulators	#VALUE!	#VALUE!	#VALUE!	#VALUE!	#VALUE!	15.2959
SERPINH1	Matrisome-associated	ECM Regulators	#VALUE!	#VALUE!	#VALUE!	#VALUE!	#VALUE!	15.8819
TIMP3	Matrisome-associated	ECM Regulators	29.8315	29.2674	29.0411	22.3444	23.0032	27.1785
PRSS1	Matrisome-associated	ECM Regulators	28.4813	28.8427	28.8682	27.9322	27.4651	27.2311
AMBP	Matrisome-associated	ECM Regulators	26.4803	26.4117	25.4279	23.7448	25.8855	25.484
CTSG	Matrisome-associated	ECM Regulators	26.5836	23.1358	26.2449	20.1416	20.3745	22.746
SLPI	Matrisome-associated	ECM Regulators	26.6905	27.1841	28.0642	#VALUE!	#VALUE!	22.5521
TGM2	Matrisome-associated	ECM Regulators	21.5392	23.1325	22.8111	16.6556	#VALUE!	24.6275
HTRA1	Matrisome-associated	ECM Regulators	23.0663	23.4582	23.3609	16.2685	#VALUE!	21.5295
MMP28	Matrisome-associated	ECM Regulators	23.0919	23.0491	22.6905	13.9874	15.3036	17.5937
SERPINA1	Matrisome-associated	ECM Regulators	22.2109	22.2775	21.8441	19.4724	23.0012	22.2591
PZP	Matrisome-associated	ECM Regulators	20.1614	19.7127	19.5643	19.1508	20.6415	21.1941
MMP23B	Matrisome-associated	ECM Regulators	21.454	21.3816	21.8096	#VALUE!	#VALUE!	19.7304
ELANE	Matrisome-associated	ECM Regulators	22.6173	17.3427	21.8419	#VALUE!	#VALUE!	#VALUE!
MMP19	Matrisome-associated	ECM Regulators	20.4328	20.737	21.2681	#VALUE!	#VALUE!	19.7406
SERPINC1	Matrisome-associated	ECM Regulators	20.9409	20.6233	20.4795	17.6701	20.7007	19.9866
ADAMTS4	Matrisome-associated	ECM Regulators	19.0916	20.3819	19.8241	16.0682	#VALUE!	17.2448
C17orf58	Matrisome-associated	ECM Regulators	19.4313	20.9882	20.5618	19.1339	19.5185	22.5673
LOXL1	Matrisome-associated	ECM Regulators	19.411	20.8139	19.7491	19.6705	#VALUE!	19.3094
HRG	Matrisome-associated	ECM Regulators	18.6959	19.4616	19.7341	17.4533	19.891	19.7753
A2M	Matrisome-associated	ECM Regulators	17.5248	18.5172	17.3625	#VALUE!	15.1942	18.038
CTSF	Matrisome-associated	ECM Regulators	18.5896	18.9417	19.385	#VALUE!	#VALUE!	19.6803
MMP12	Matrisome-associated	ECM Regulators	16.9248	18.2928	20.5678	#VALUE!	#VALUE!	18.1264
SERPINE2	Matrisome-associated	ECM Regulators	18.5101	17.0127	18.5753	#VALUE!	14.4826	16.8377
ADAMTS5	Matrisome-associated	ECM Regulators	16.8009	17.1441	17.6895	14.3862	#VALUE!	17.1372
AGT	Matrisome-associated	ECM Regulators	#VALUE!	17.8666	#VALUE!	#VALUE!	#VALUE!	#VALUE!
LOX	Matrisome-associated	ECM Regulators	17.7587	18.0408	18.3179	18.0377	#VALUE!	#VALUE!
HTRA3	Matrisome-associated	ECM Regulators	17.2768	17.8866	19.2286	#VALUE!	#VALUE!	#VALUE!
SERPING1	Matrisome-associated	ECM Regulators	17.6197	17.8237	16.4471	#VALUE!	13.7422	#VALUE!
ITIH4	Matrisome-associated	ECM Regulators	16.4389	16.4929	16.5758	13.8133	15.4548	17.7214
ADAMTSL1	Matrisome-associated	ECM Regulators	13.2324	15.4699	15.5191	14.81	12.9934	16.0455
SERPINA4	Matrisome-associated	ECM Regulators	17.8513	17.0092	17.3277	#VALUE!	16.2181	18.4155
ADAMTSL3	Matrisome-associated	ECM Regulators	15.2626	16.2679	15.3367	#VALUE!	#VALUE!	14.9575
F13A1	Matrisome-associated	ECM Regulators	#VALUE!	14.9271	17.5385	#VALUE!	15.4158	20.5039
ITIH3	Matrisome-associated	ECM Regulators	15.7377	14.7227	16.7478	15.0151	14.0145	19.1999
SERPINA5	Matrisome-associated	ECM Regulators	16.6798	16.4329	15.7576	#VALUE!	#VALUE!	#VALUE!
ITIH5	Matrisome-associated	ECM Regulators	14.6062	15.0938	15.8089	#VALUE!	#VALUE!	16.5689
PCSK5	Matrisome-associated	ECM Regulators	14.7555	13.8236	13.9441	#VALUE!	#VALUE!	#VALUE!
PRSS12	Matrisome-associated	ECM Regulators	#VALUE!	15.1811	14.8458	#VALUE!	#VALUE!	#VALUE!
SERPINA3	Matrisome-associated	ECM Regulators	#VALUE!	16.4118	15.536	#VALUE!	15.147	#VALUE!
HPSE2	Matrisome-associated	ECM Regulators	#VALUE!	#VALUE!	15.4127	#VALUE!	#VALUE!	#VALUE!
KNG1	Matrisome-associated	ECM Regulators	14.7043	15.7652	#VALUE!	#VALUE!	#VALUE!	#VALUE!
ADAMTS17	Matrisome-associated	ECM Regulators	13.8644	15.4512	14.2991	#VALUE!	#VALUE!	#VALUE!
CTSD	Matrisome-associated	ECM Regulators	#VALUE!	#VALUE!	15.1275	14.4303	16.1592	23.5373
SERPIND1	Matrisome-associated	ECM Regulators	13.2584	14.4948	#VALUE!	#VALUE!	13.3355	16.0049
ANXA4	Matrisome-associated	ECM-affiliated Proteins	#VALUE!	#VALUE!	#VALUE!	#VALUE!	#VALUE!	22.0222
LGALS9	Matrisome-associated	ECM-affiliated Proteins	#VALUE!	#VALUE!	#VALUE!	#VALUE!	#VALUE!	19.2626
SEMA3B	Matrisome-associated	ECM-affiliated Proteins	20.6729	19.9069	20.1063	#VALUE!	17.0593	17.7652
CLEC9A	Matrisome-associated	ECM-affiliated Proteins	21.904	21.3132	21.1857	#VALUE!	#VALUE!	21.6571
ANXA1	Matrisome-associated	ECM-affiliated Proteins	19.5581	20.9879	20.8044	14.9336	16.0711	24.4251
LMAN1	Matrisome-associated	ECM-affiliated Proteins	19.8455	19.3425	19.7139	#VALUE!	#VALUE!	21.5225
ANXA6	Matrisome-associated	ECM-affiliated Proteins	18.7436	17.9503	19.8165	14.9133	16.0606	25.525
ANXA11	Matrisome-associated	ECM-affiliated Proteins	16.246	19.4701	18.5367	14.0349	#VALUE!	22.5985
SFTPA1	Matrisome-associated	ECM-affiliated Proteins	19.5308	#VALUE!	19.3999	#VALUE!	#VALUE!	#VALUE!
C1QB	Matrisome-associated	ECM-affiliated Proteins	#VALUE!	19.2965	19.5397	#VALUE!	#VALUE!	19.2677
ANXA2	Matrisome-associated	ECM-affiliated Proteins	18.7987	19.2533	18.6773	16.261	20.8477	23.5307
C1QC	Matrisome-associated	ECM-affiliated Proteins	19.2182	#VALUE!	#VALUE!	#VALUE!	#VALUE!	19.5011
CLEC3B	Matrisome-associated	ECM-affiliated Proteins	19.4504	18.8224	#VALUE!	#VALUE!	#VALUE!	#VALUE!
SEMA3G	Matrisome-associated	ECM-affiliated Proteins	17.2764	16.9003	16.9528	#VALUE!	17.2905	#VALUE!
HPX	Matrisome-associated	ECM-affiliated Proteins	18.0372	17.4045	17.5886	13.5926	17.3027	19.0348
ANXA7	Matrisome-associated	ECM-affiliated Proteins	#VALUE!	17.4686	17.3493	#VALUE!	#VALUE!	21.9337
SFTPB	Matrisome-associated	ECM-affiliated Proteins	16.8551	#VALUE!	17.1686	#VALUE!	#VALUE!	#VALUE!
CD209	Matrisome-associated	ECM-affiliated Proteins	16.4934	#VALUE!	#VALUE!	#VALUE!	#VALUE!	20.3644
LGALS1	Matrisome-associated	ECM-affiliated Proteins	#VALUE!	16.7911	#VALUE!	#VALUE!	17.1791	22.1139
PLXND1	Matrisome-associated	ECM-affiliated Proteins	12.7718	#VALUE!	#VALUE!	#VALUE!	#VALUE!	15.6049
PRG3	Core matrisome	Proteoglycans	#VALUE!	#VALUE!	#VALUE!	#VALUE!	#VALUE!	19.8041
PODNL1	Core matrisome	Proteoglycans	#VALUE!	#VALUE!	#VALUE!	#VALUE!	15.2226	#VALUE!
HSPG2	Core matrisome	Proteoglycans	25.7684	25.437	25.5385	23.3999	24.5041	23.7819
BGN	Core matrisome	Proteoglycans	24.2389	24.9059	24.4562	21.2211	23.5626	24.0946
DCN	Core matrisome	Proteoglycans	23.2797	23.8812	23.5537	23.8634	25.1	23.2493
VCAN	Core matrisome	Proteoglycans	19.9385	20.2965	20.7415	17.5267	16.1132	17.203
PRELP	Core matrisome	Proteoglycans	22.651	23.0808	22.8498	22.2465	22.462	22.6263
OGN	Core matrisome	Proteoglycans	21.8755	22.9169	22.9843	22.2502	23.5557	21.8646
LUM	Core matrisome	Proteoglycans	21.3163	22.956	22.7144	21.8959	22.7986	22.3951
PRG4	Core matrisome	Proteoglycans	19.8082	20.348	19.7872	#VALUE!	12.2003	19.1633
PODN	Core matrisome	Proteoglycans	19.7038	21.4378	20.9043	#VALUE!	16.1299	17.1094
ASPN	Core matrisome	Proteoglycans	20.6218	21.7213	21.3328	20.1864	22.6969	24.7334
PRG2	Core matrisome	Proteoglycans	21.1302	23.9406	21.9364	#VALUE!	#VALUE!	25.4407
FMOD	Core matrisome	Proteoglycans	#VALUE!	#VALUE!	15.2166	#VALUE!	#VALUE!	17.3759
IL18	Matrisome-associated	Secreted Factors	#VALUE!	#VALUE!	#VALUE!	#VALUE!	#VALUE!	20.513
S100A6	Matrisome-associated	Secreted Factors	#VALUE!	#VALUE!	#VALUE!	#VALUE!	#VALUE!	21.3934
CXCL12	Matrisome-associated	Secreted Factors	25.6746	25.6725	24.7639	#VALUE!	#VALUE!	22.6072
TNFSF13	Matrisome-associated	Secreted Factors	23.3495	23.1249	23.0766	#VALUE!	#VALUE!	18.8502
GDF10	Matrisome-associated	Secreted Factors	21.5036	21.5742	20.8772	13.872	16.6995	#VALUE!
CHRDL1	Matrisome-associated	Secreted Factors	21.2283	21.2478	20.9006	#VALUE!	#VALUE!	#VALUE!
WNT11	Matrisome-associated	Secreted Factors	21.4432	21.6922	21.135	15.8049	#VALUE!	20.5579
WNT2	Matrisome-associated	Secreted Factors	21.6765	21.3063	20.8284	13.9927	#VALUE!	17.7756
PDGFB	Matrisome-associated	Secreted Factors	21.7419	21.3796	21.1788	#VALUE!	13.8555	13.7031
CCL28	Matrisome-associated	Secreted Factors	22.1693	20.8691	23.4487	19.2107	20.1773	22.1208
IL17D	Matrisome-associated	Secreted Factors	21.5069	22.2123	20.586	#VALUE!	#VALUE!	19.8452
WNT2B	Matrisome-associated	Secreted Factors	20.1483	20.8348	20.4199	17.3423	16.4072	20.0106
TNFSF10	Matrisome-associated	Secreted Factors	22.4326	20.2453	20.7101	#VALUE!	#VALUE!	#VALUE!
WNT7B	Matrisome-associated	Secreted Factors	20.4335	18.6385	21.0882	#VALUE!	#VALUE!	#VALUE!
CCL19	Matrisome-associated	Secreted Factors	21.8168	22.3958	22.0878	21.9444	20.0166	23.5559
WNT9A	Matrisome-associated	Secreted Factors	20.0708	20.3087	20.1307	#VALUE!	#VALUE!	18.334
PDGFA	Matrisome-associated	Secreted Factors	21.1949	20.8563	19.9091	#VALUE!	#VALUE!	#VALUE!
ANGPTL2	Matrisome-associated	Secreted Factors	19.1783	19.6492	19.5888	15.8178	#VALUE!	19.9022
WNT9B	Matrisome-associated	Secreted Factors	19.8175	20.8111	17.8437	18.6441	#VALUE!	21.4786
S100A4	Matrisome-associated	Secreted Factors	#VALUE!	20.3318	22.7716	#VALUE!	#VALUE!	23.8042
BMP5	Matrisome-associated	Secreted Factors	19.187	19.3479	18.9498	#VALUE!	#VALUE!	#VALUE!
WNT4	Matrisome-associated	Secreted Factors	19.5781	17.0733	20.2504	18.1857	#VALUE!	19.863
EGFL7	Matrisome-associated	Secreted Factors	20.6677	19.9033	19.2374	20.2047	#VALUE!	21.327
INHBC	Matrisome-associated	Secreted Factors	19.7309	19.1236	19.4936	18.8857	18.7569	20.7484
S100A11	Matrisome-associated	Secreted Factors	21.7383	21.116	21.1722	#VALUE!	#VALUE!	20.0547
CXCL13	Matrisome-associated	Secreted Factors	20.3657	21.0078	25.2183	19.4018	#VALUE!	23.2962
LEFTY2	Matrisome-associated	Secreted Factors	20.9463	19.3025	19.2502	#VALUE!	#VALUE!	#VALUE!
VEGFB	Matrisome-associated	Secreted Factors	20.1469	20.3762	20.205	16.7255	17.0778	19.2915
ANGPTL6	Matrisome-associated	Secreted Factors	18.7631	18.8569	19.0415	14.8335	#VALUE!	19.7069
EBI3	Matrisome-associated	Secreted Factors	19.7975	18.8948	19.9449	16.8127	#VALUE!	20.6604
BMP3	Matrisome-associated	Secreted Factors	18.1126	18.6374	18.847	#VALUE!	#VALUE!	#VALUE!
WNT3A	Matrisome-associated	Secreted Factors	18.8045	18.989	19.8341	#VALUE!	#VALUE!	#VALUE!
WNT6	Matrisome-associated	Secreted Factors	19.0063	18.8736	#VALUE!	#VALUE!	21.3117	19.2316
CCL21	Matrisome-associated	Secreted Factors	#VALUE!	20.0127	20.5733	20.1114	#VALUE!	25.2461
DHH	Matrisome-associated	Secreted Factors	18.6922	17.4655	18.11	#VALUE!	#VALUE!	#VALUE!
WNT5B	Matrisome-associated	Secreted Factors	18.0273	17.3209	18.7821	#VALUE!	#VALUE!	17.465
S100A9	Matrisome-associated	Secreted Factors	19.7993	#VALUE!	19.3493	20.8072	#VALUE!	20.0506
BDNF	Matrisome-associated	Secreted Factors	18.2231	20.5992	17.6452	#VALUE!	#VALUE!	#VALUE!
FLG2	Matrisome-associated	Secreted Factors	15.0153	14.0174	15.9127	15.078	14.9697	15.8513
EGFL8	Matrisome-associated	Secreted Factors	17.9371	#VALUE!	#VALUE!	#VALUE!	19.6296	#VALUE!
S100A7	Matrisome-associated	Secreted Factors	#VALUE!	#VALUE!	19.3446	19.9538	#VALUE!	18.5515
WNT10A	Matrisome-associated	Secreted Factors	#VALUE!	#VALUE!	17.0347	16.8491	#VALUE!	#VALUE!
GDF15	Matrisome-associated	Secreted Factors	16.8975	16.5314	17.4013	#VALUE!	#VALUE!	#VALUE!
INHBE	Matrisome-associated	Secreted Factors	17.0004	16.1697	16.5848	15.3865	#VALUE!	18.7823
TNFSF12	Matrisome-associated	Secreted Factors	16.3027	16.9787	16.7586	#VALUE!	#VALUE!	#VALUE!
CRLF1	Matrisome-associated	Secreted Factors	#VALUE!	15.3602	16.5724	#VALUE!	#VALUE!	17.6441
INHBB	Matrisome-associated	Secreted Factors	15.8375	15.5726	16.0031	14.6291	#VALUE!	16.111
FGF23	Matrisome-associated	Secreted Factors	15.7328	16.7345	14.9922	15.3398	#VALUE!	#VALUE!
IL16	Matrisome-associated	Secreted Factors	13.9004	12.4355	#VALUE!	#VALUE!	12.7097	16.1689
